# Supplementary material
Source: Springer Nature journal article supplement (https://www.springermedizin.de/resource/supplementary/12905_2010_226_MOESM2_ESM.pdf/9518232)

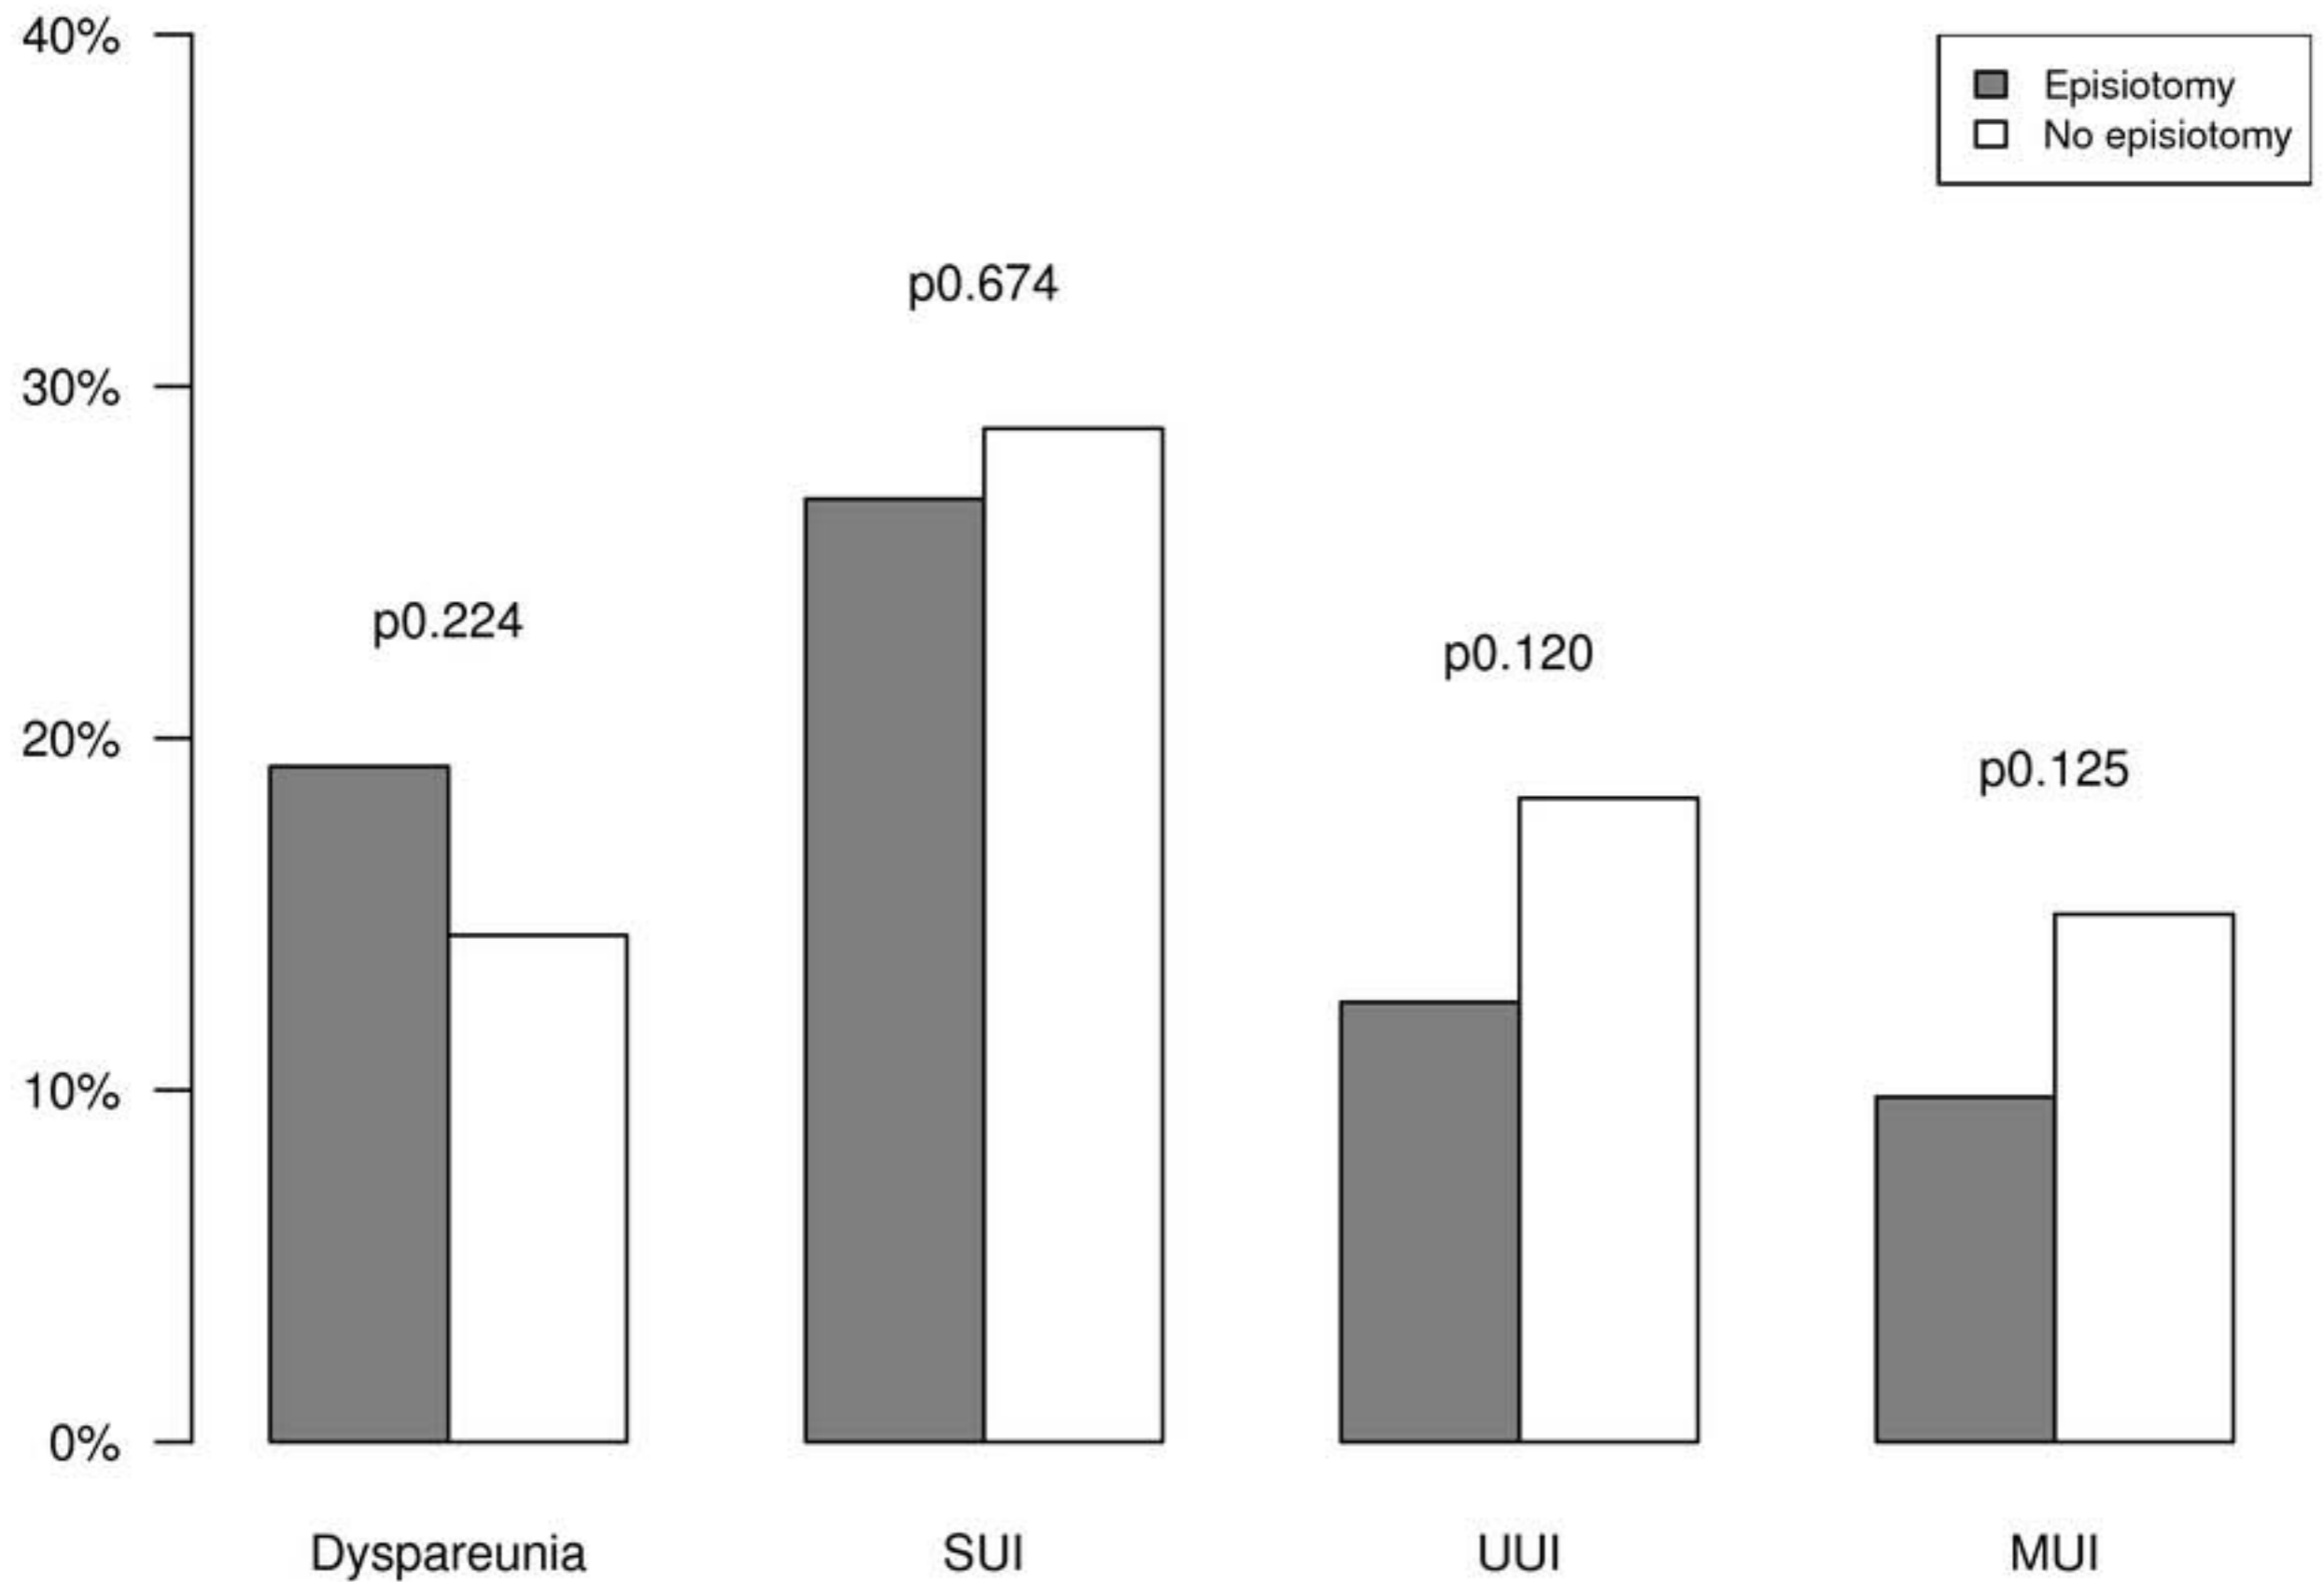

Supplement: MOESM2 [file 9518232]
